# Supplementary material for: Nutrient-wide association study of 92 foods and nutrients and breast cancer risk
Source: Breast Cancer Res. 2020 Jan 13;22:5. doi: 10.1186/s13058-019-1244-7 (PMC6958698; doi:10.1186/s13058-019-1244-7)
Supplement: Supplementary file 2 — Additional file 2: Model estimates. Estimates from the models for the 92 dietary factors that were evaluated in the EPIC study. [file 13058_2019_1244_MOESM2_ESM.csv]

var	nevent	py	coef	lci	uci	z	se	p	q	neg_log10_q	neg_log10_p	set_factor
apple/pear	10979	13806178.41	-0.037085395	-0.059107823	-0.015062968	-3.300606814	0.011235933	0.00096476	0.014792984	1.829944216	3.015580793	fruit and vegetables
banana	10979	13806178.41	-0.005543188	-0.029338642	0.018252266	-0.456585061	0.012140538	0.647969319	0.821479723	0.085403152	0.188445557	fruit and vegetables
beef	10979	13806178.41	0.013435895	-0.008508338	0.035380127	1.200058063	0.011196037	0.230116791	0.504065352	0.297513154	0.638051691	meat and fish
beer/cider	10979	13806178.41	0.041658883	0.026038851	0.057278916	5.227352175	0.007969404	1.72E-07	7.91E-06	5.101827918	6.764585749	alcoholic beverages
berries	10979	13806178.41	0.000881264	-0.018491048	0.020253575	0.089162128	0.009883832	0.928953063	0.971178202	0.012701074	0.032006229	fruit and vegetables
breakfast cereal	10979	13806178.41	-0.019612843	-0.047016083	0.007790398	-1.402796547	0.013981245	0.160677517	0.410620321	0.386559561	0.794044888	cereals/cereal products
biscuits	10979	13806178.41	-0.027894057	-0.049720439	-0.006067676	-2.504874778	0.011135909	0.012249475	0.132232084	0.878663157	1.911882514	sugar and confectionery
nonwhite bread	10979	13806178.41	-0.033034118	-0.059521494	-0.006546742	-2.444442645	0.013513967	0.014507615	0.133470055	0.874616162	1.838403989	cereals/cereal products
bread	10979	13806178.41	-0.005493977	-0.025598983	0.01461103	-0.535597655	0.010257656	0.592236649	0.821479723	0.085403152	0.227504721	cereals/cereal products
white bread	10979	13806178.41	0.01422571	-0.007861099	0.036312519	1.26240015	0.01126878	0.206804835	0.475651121	0.322711475	0.684439312	cereals/cereal products
butter	10979	13806178.41	0.024454623	0.005170608	0.043738637	2.485533329	0.009838783	0.012935747	0.132232084	0.878663157	1.888208475	dairy products
cabbage	10979	13806178.41	0.00558184	-0.023498742	0.034662422	0.376210026	0.014837032	0.706760762	0.821479723	0.085403152	0.15072757	fruit and vegetables
cake	10979	13806178.41	-0.024997298	-0.047398598	-0.002595999	-2.187136697	0.011429235	0.028732546	0.165212142	0.781958038	1.541625883	sugar and confectionery
cheese	10979	13806178.41	-0.017894143	-0.037994557	0.002206272	-1.74486552	0.010255313	0.08100828	0.248425393	0.604804014	1.091470586	dairy products
chocolate	10979	13806178.41	-0.004323129	-0.024547451	0.015901194	-0.418967432	0.010318532	0.675239934	0.821479723	0.085403152	0.170541881	sugar and confectionery
citrus fruit	10979	13806178.41	0.00142092	-0.020346038	0.023187878	0.127946387	0.011105591	0.898191401	0.949811596	0.022362532	0.046631107	fruit and vegetables
coffee	10979	13806178.41	-0.013039225	-0.034814603	0.008736154	-1.173659494	0.011109887	0.240531441	0.514625408	0.288508776	0.618828147	non-alcoholic beverages
cream puddings	10979	13806178.41	-0.011584626	-0.031895949	0.008726697	-1.1178921	0.01036292	0.263613079	0.538942296	0.268457732	0.579033046	dairy products
crispbread	10979	13806178.41	-0.008297274	-0.030978729	0.014384182	-0.717002326	0.011572171	0.473372662	0.786409215	0.104351406	0.324796827	cereals/cereal products
eggs	10979	13806178.41	0.000661688	-0.018156473	0.01947985	0.068917938	0.009601103	0.94505494	0.976910725	0.010145123	0.024542943	other
fatty fish	10979	13806178.41	-0.005952596	-0.027987209	0.016082017	-0.52948912	0.011242149	0.59646619	0.821479723	0.085403152	0.224414169	meat and fish
lean fish	10979	13806178.41	-0.008758427	-0.035008701	0.017491847	-0.653955748	0.013392997	0.513140316	0.821479723	0.085403152	0.289763863	meat and fish
fish products	10979	13806178.41	-0.003651706	-0.027883418	0.020580006	-0.295370956	0.012363118	0.767710518	0.859320594	0.06584478	0.114802509	meat and fish
fish	10979	13806178.41	-0.004767317	-0.029625947	0.020091313	-0.375883214	0.012682975	0.70700372	0.821479723	0.085403152	0.150578301	meat and fish
fortified wine	10979	13806178.41	0.003685926	-0.013522461	0.020894313	0.419819423	0.008779789	0.674617375	0.821479723	0.085403152	0.170942478	alcoholic beverages
fruiting veg	10979	13806178.41	-0.020505589	-0.048680844	0.007669665	-1.426462885	0.01437513	0.153734773	0.410620321	0.386559561	0.81322789	fruit and vegetables
fruit	10979	13806178.41	-0.019804824	-0.040979557	0.001369909	-1.833196889	0.010803435	0.066773296	0.212535981	0.672567536	1.175397183	fruit and vegetables
fruit/veg juice	10979	13806178.41	0.01056194	-0.009954672	0.031078552	1.009006879	0.010467659	0.312971335	0.612624741	0.212805468	0.504495437	non-alcoholic beverages
grapes	10979	13806178.41	0.004310513	-0.018770161	0.027391188	0.366046747	0.011775854	0.714330194	0.821479723	0.085403152	0.146100993	fruit and vegetables
ice cream	10979	13806178.41	-0.023899011	-0.046231816	-0.001566206	-2.09745535	0.011394288	0.035953286	0.183761238	0.735746091	1.444261413	dairy products
lamb	10979	13806178.41	0.004764033	-0.016569215	0.026097281	0.437697303	0.01088431	0.661605724	0.821479723	0.085403152	0.179400746	meat and fish
leafy veg	10979	13806178.41	-0.027926561	-0.053900412	-0.00195271	-2.107352486	0.013251965	0.035087037	0.183761238	0.735746091	1.454853306	fruit and vegetables
legumes	10979	13806178.41	-0.000522196	-0.02539499	0.024350598	-0.041149546	0.012690201	0.967176676	0.988669491	0.004948867	0.014494185	fruit and vegetables
liver	10979	13806178.41	-0.006078643	-0.024591746	0.01243446	-0.643551794	0.009445461	0.519866118	0.821479723	0.085403152	0.284108486	meat and fish
margarine	10979	13806178.41	0.029826578	0.005509646	0.054143509	2.404090032	0.012406598	0.01621278	0.135597795	0.867747373	1.790142516	other
vegetable margarine	10979	13806178.41	0.014032109	-0.008716321	0.036780539	1.209003619	0.011606342	0.226661455	0.504065352	0.297513154	0.644622328	other
mayonnaise	10979	13806178.41	0.01844172	-0.008718535	0.045601975	1.330833305	0.013857273	0.183243867	0.443643045	0.352966322	0.736970553	other
mollusks	10979	13806178.41	0.017356421	-0.000638442	0.035351283	1.890460904	0.009181052	0.058696345	0.21001454	0.677750636	1.231388944	meat and fish
mushrooms	10979	13806178.41	0.009076	-0.013989562	0.032141561	0.771234626	0.011768144	0.440567874	0.764759328	0.116475217	0.355987175	fruit and vegetables
nuts	10979	13806178.41	0.014315034	-0.005479941	0.034110008	1.417403511	0.010099477	0.156364987	0.410620321	0.386559561	0.805860488	fruit and vegetables
offal	10979	13806178.41	-0.002573878	-0.021030473	0.015882717	-0.273333242	0.00941663	0.784597064	0.859320594	0.06584478	0.105353321	meat and fish
onion/garlic	10979	13806178.41	-0.012120238	-0.038300632	0.014060157	-0.907383805	0.013357344	0.36420387	0.683811349	0.165063696	0.438655443	fruit and vegetables
pasta/grains	10979	13806178.41	-0.013268926	-0.036396793	0.009858941	-1.124491707	0.011799932	0.260804487	0.538942296	0.268457732	0.583684941	cereals/cereal products
pod veg	10979	13806178.41	-0.006111227	-0.033638634	0.021416181	-0.435130134	0.014044596	0.663467972	0.821479723	0.085403152	0.178180038	fruit and vegetables
pork	10979	13806178.41	0.00786061	-0.013344585	0.029065805	0.726557612	0.010818977	0.467497002	0.786409215	0.104351406	0.330221169	meat and fish
potato	10979	13806178.41	0.022190335	-0.000148411	0.04452908	1.946978409	0.011397319	0.051537323	0.206149293	0.685818151	1.287878142	fruit and vegetables
poultry	10979	13806178.41	-0.001480024	-0.021755936	0.018795888	-0.143068644	0.010344853	0.886235968	0.949811596	0.022362532	0.052450628	meat and fish
other processed meat	10979	13806178.41	0.009363955	-0.011732126	0.030460035	0.869988687	0.010763306	0.384306587	0.707124119	0.150504349	0.415322172	meat and fish
processed meat	10979	13806178.41	0.010946459	-0.010993225	0.032886144	0.977911063	0.011193717	0.328118313	0.628893433	0.20142294	0.48396953	meat and fish
alcohol	10979	13806178.41	0.051110945	0.034249418	0.067972472	5.941185012	0.00860282	2.83E-09	2.60E-07	6.584473267	8.548261094	nutrients
calcium	10979	13806178.41	-0.01954783	-0.038789164	-0.000306495	-1.99122086	0.009817007	0.046456611	0.203524203	0.691383938	1.332952471	nutrients
beta carotene	10979	13806178.41	-0.023106508	-0.04290182	-0.003311195	-2.287852504	0.010099649	0.022146112	0.145502335	0.837130037	1.654702508	nutrients
carbohydrates	10979	13806178.41	-0.036364582	-0.056286249	-0.016442916	-3.577741893	0.010164116	0.000346575	0.006376988	2.195384402	3.460202225	nutrients
cholesterol	10979	13806178.41	0.003752104	-0.017218955	0.024723163	0.350679645	0.01069952	0.725828698	0.824398027	0.083863056	0.139165865	nutrients
monounsaturated fats	10979	13806178.41	0.007653142	-0.019647453	0.034953738	0.549444388	0.013928875	0.582700519	0.821479723	0.085403152	0.234554595	nutrients
polyunsaturated fats	10979	13806178.41	-0.006343545	-0.027937986	0.015250896	-0.575766152	0.011017572	0.564773255	0.821479723	0.085403152	0.248125877	nutrients
saturated fats	10979	13806178.41	0.007925941	-0.011931072	0.027782955	0.782335451	0.010131129	0.434017458	0.764759328	0.116475217	0.362492801	nutrients
animal fats	10979	13806178.41	0.008143324	-0.012164718	0.028451366	0.785940649	0.010361246	0.431902259	0.764759328	0.116475217	0.364614525	nutrients
plant fats	10979	13806178.41	-0.019827497	-0.048944288	0.009289294	-1.334690123	0.014855506	0.181977788	0.443643045	0.352966322	0.739981619	nutrients
total fats	10979	13806178.41	0.005251556	-0.015050328	0.025553439	0.506999702	0.010358104	0.612155027	0.821479723	0.085403152	0.21313858	nutrients
iron	10979	13806178.41	-0.011621353	-0.033057453	0.009814747	-1.062593113	0.010936786	0.287966512	0.575933024	0.239628019	0.540658014	nutrients
fibre	10979	13806178.41	-0.042366382	-0.063355956	-0.021376808	-3.956159775	0.010708966	7.62E-05	0.001751777	2.756521103	4.118248939	nutrients
potassium	10979	13806178.41	-0.02252946	-0.044341422	-0.000717497	-2.024473541	0.011128552	0.042921452	0.197438678	0.704567766	1.367325598	nutrients
magnesium	10979	13806178.41	-0.02445718	-0.045646374	-0.003267987	-2.262288697	0.010810813	0.023679572	0.145502335	0.837130037	1.625626146	nutrients
phosphorus	10979	13806178.41	-0.02056211	-0.042108246	0.000984026	-1.870485543	0.010992927	0.061416423	0.21001454	0.677750636	1.211715483	nutrients
animal proteins	10979	13806178.41	-0.004187601	-0.025870249	0.017495048	-0.378537576	0.011062576	0.705031285	0.821479723	0.085403152	0.151791611	nutrients
plant proteins	10979	13806178.41	-0.018330465	-0.041170869	0.004509939	-1.572989278	0.011653268	0.115721301	0.33269874	0.477948844	0.936586693	nutrients
total proteins	10979	13806178.41	-0.016226115	-0.037572045	0.005119815	-1.489894597	0.010890781	0.136251952	0.379853928	0.420383378	0.865657266	nutrients
retinol	10979	13806178.41	-0.005423795	-0.024550681	0.013703091	-0.555795544	0.009758615	0.578350632	0.821479723	0.085403152	0.237808786	nutrients
riboflavin	10979	13806178.41	-0.018924733	-0.041906423	0.004056957	-1.614001294	0.011725352	0.106527146	0.316145077	0.500113576	0.97253971	nutrients
starch	10979	13806178.41	-0.023378604	-0.043639667	-0.003117542	-2.261582556	0.010337277	0.023723207	0.145502335	0.837130037	1.624826606	nutrients
sugar	10979	13806178.41	-0.020211895	-0.041291233	0.000867444	-1.87934329	0.010754765	0.060197634	0.21001454	0.677750636	1.220420576	nutrients
thiamine	10979	13806178.41	-0.028570748	-0.059142589	0.002001094	-1.83170732	0.015597878	0.066995037	0.212535981	0.672567536	1.173957366	nutrients
vit B12	10979	13806178.41	-0.002597892	-0.021224504	0.01602872	-0.273365259	0.009503374	0.784572455	0.859320594	0.06584478	0.105366943	nutrients
vit B6	10979	13806178.41	-0.005829013	-0.030946662	0.019288637	-0.454854053	0.012815127	0.64921424	0.821479723	0.085403152	0.187611963	nutrients
vit C	10979	13806178.41	-0.006302124	-0.027915332	0.015311083	-0.571509998	0.011027146	0.567653985	0.821479723	0.085403152	0.245916309	nutrients
vit D	10979	13806178.41	-0.005554138	-0.031103371	0.019995096	-0.426083606	0.013035323	0.670046926	0.821479723	0.085403152	0.173894781	nutrients
vit E	10979	13806178.41	-0.023700121	-0.046442236	-0.000958006	-2.042564495	0.01160312	0.041095569	0.197438678	0.704567766	1.386205004	nutrients
red meat	10979	13806178.41	0.013360959	-0.007306991	0.034028908	1.267057447	0.010544872	0.205134749	0.475651121	0.322711475	0.687960765	meat and fish
root veg	10979	13806178.41	-0.019825591	-0.040617424	0.000966241	-1.868914562	0.010608078	0.061634702	0.21001454	0.677750636	1.2101747	fruit and vegetables
sauces	10979	13806178.41	-0.009212242	-0.034699903	0.01627542	-0.708420976	0.013003909	0.47868387	0.786409215	0.104351406	0.319951207	other
savoury biscuits	10979	13806178.41	-0.006215698	-0.028203463	0.015772067	-0.554070298	0.011218247	0.579530736	0.821479723	0.085403152	0.236923526	cereals/cereal products
soft drinks	10979	13806178.41	-0.00451008	-0.026464501	0.017444341	-0.402641312	0.011201235	0.687212113	0.821479723	0.085403152	0.162909194	non-alcoholic beverages
soups	10979	13806178.41	-0.020742325	-0.04157995	9.53E-05	-1.951036028	0.010631441	0.05105276	0.206149293	0.685818151	1.291980773	other
spirits	10979	13806178.41	0.021277882	0.005354945	0.037200818	2.619155614	0.008123947	0.008814773	0.115851298	0.936099096	2.054788884	alcoholic beverages
stalk veg	10979	13806178.41	-0.027797136	-0.051707611	-0.003886661	-2.278599069	0.012199222	0.022690909	0.145502335	0.837130037	1.644148099	fruit and vegetables
stone fruit	10979	13806178.41	3.11E-05	-0.0203034	0.020365562	0.002995846	0.010374735	0.997609664	0.997609664	0.001039352	0.001039352	fruit and vegetables
sugars	10979	13806178.41	-0.001262441	-0.019873784	0.017348903	-0.132950297	0.009495583	0.894232689	0.949811596	0.022362532	0.048549458	sugar and confectionery
tea	10979	13806178.41	0.006358245	-0.015440823	0.028157312	0.571683151	0.011121973	0.567536651	0.821479723	0.085403152	0.246006087	non-alcoholic beverages
total milk	10979	13806178.41	0.004288099	-0.015443358	0.024019555	0.425953033	0.01006707	0.67014207	0.821479723	0.085403152	0.173833117	dairy products
wine	10979	13806178.41	0.036868087	0.020045642	0.053690532	4.295537889	0.00858288	1.74E-05	0.000534429	3.272110129	4.758776701	alcoholic beverages
yoghurt	10979	13806178.41	-0.000111298	-0.019209035	0.018986438	-0.011422558	0.009743743	0.990886315	0.997609664	0.001039352	0.003976169	dairy products
